# Supplementary material for: A Bayesian posterior predictive framework for weighting ensemble regional climate models
Source: Copernicus journal article supplement (doi:10.5194/gmd-10-2321-2017), 2017-06-23
Supplement: Supplementary file 1 [file gmd-10-2321-2017-supplement.zip]

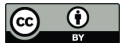

## *Supplement of*

# **A Bayesian posterior predictive framework for weighting ensemble regional climate models**

**Yanan Fan et al.**

*Correspondence to:* Yanan Fan (y.fan@unsw.edu.au)

- gmd-10-2321-2017-supplement-title-page.pdf
- Code&Data
  - .Rapp.history
  - BMAutils.R
  - input
    - \* other
    - \* tasmean
  - load\_models.R
  - load\_obs.R
  - plotPDF-PP.R
  - weightsBMA-norm-CV.R
  - weightsBMA-norm.R

The copyright of individual parts of the supplement might differ from the CC BY 3.0 License.
